# Supplementary material
Source: publisher figshare collection journal article supplement (https://gsapubs.figshare.com/ndownloader/files/34594568)
Supplement: Supplementary file 1 [file 34594568]

## Sheet: PlotDat96
Source sheet	Samples	0.901	0.1035	0.87	0.103616	0.870797	0.10369	0.924254	0.103932
Plot name	Concordia95	IsoLine	IsoLine	0.87	0.103616	0.87264	0.103862	0.924152	0.104036
Plot Type	1			0.870513	0.103664	0.874486	0.104033	0.923854	0.104135
1st free col	11			0.871026	0.103712	0.876333	0.104204	0.92336	0.104229
Sigma Level	2			0.871539	0.103759	0.878181	0.104375	0.922676	0.104317
Absolute Errs	TRUE			0.872053	0.103807	0.880032	0.104547	0.921806	0.104397
Symbol Type	1			0.872566	0.103855	0.881885	0.104718	0.920759	0.10447
Inverse Plot	FALSE			0.87308	0.103902	0.883739	0.10489	0.919544	0.104535
Color Plot	TRUE			0.873594	0.10395	IsoLine	IsoLine	0.91817	0.104591
3D plot	FALSE			0.874108	0.103998			0.91665	0.104637
Linear	FALSE			0.874622	0.104046			0.914996	0.104674
Data Range	N731:R731			0.875136	0.104093			0.913223	0.104701
Filled Symbols	FALSE			0.875651	0.104141			0.911346	0.104718
ConcAge	FALSE			0.876165	0.104189			0.90938	0.104724
ConcSwap	FALSE			0.87668	0.104236			0.907343	0.10472
1st Symbol-row	1			0.877195	0.104284			0.905252	0.104705
				0.87771	0.104332			0.903124	0.10468
				0.878225	0.10438			0.900979	0.104645
				0.87874	0.104427			0.898833	0.1046
				0.879256	0.104475			0.896706	0.104546
				0.879771	0.104523			0.894616	0.104483
				0.880287	0.10457			0.89258	0.104412
				0.880803	0.104618			0.890616	0.104332
				0.881319	0.104666			0.88874	0.104246
				0.881835	0.104714			0.88697	0.104153
				0.882351	0.104761			0.885318	0.104055
				0.882868	0.104809			0.883801	0.103952
				0.883384	0.104857			0.88243	0.103845
				0.883901	0.104905			0.881218	0.103735
				0.884418	0.104952			0.880175	0.103624
				0.884935	0.105			0.879309	0.103511
				0.884935	0.105			0.878628	0.103398
				IsoLine	IsoLine			0.878138	0.103286
								0.877844	0.103175
								0.877746	0.103068
								0.877848	0.102964
								0.878146	0.102865
								0.87864	0.102771
								0.879324	0.102683
								0.880194	0.102603
								0.881241	0.10253
								0.882456	0.102465
								0.88383	0.102409
								0.88535	0.102363
								0.887004	0.102326
								0.888777	0.102299
								0.890654	0.102282
								0.89262	0.102276
								0.894657	0.10228
								0.896748	0.102295
								0.898876	0.10232
								0.901021	0.102355
								0.903167	0.1024
								0.905294	0.102454
								0.907384	0.102517
								0.90942	0.102588
								0.911384	0.102668
								0.91326	0.102754
								0.91503	0.102847
								0.916682	0.102945
								0.918199	0.103048
								0.91957	0.103155
								0.920782	0.103265
								0.921825	0.103376
								0.922691	0.103489
								0.923372	0.103602
								0.923862	0.103714
								0.924156	0.103825
								0.924254	0.103932

## Sheet: Samples
Table S1: LA-ICP-MS U-Pb isotopic analyses of detrital zircon samples analyzed at the University of New Brunswick.																	Corrections			cps = counts per second
																	1	threshold 204cps for no correction				100	cps
Second column indicates zircon analyses used in calculations: 1=crystallization age or maximum depositional age; 2=next oldest population; 3=next oldest population after that (etc).																	2	threshold % for 204-based correction				20	% error
																	3	threshold % for 208-based correction				98.5	%Pb*
													Isotopic ratios							Calculated ages
Sample	Fraction	Zr90 cps	U (ppm)	Th (ppm)	Th/U	204Pb cps	2σ error	% error	206Pb cps/	%Pb*	Corrections		207Pb/	2σ	206Pb/	2σ	err.	207Pb/	2σ	207Pb/	2σ	207Pb/	2σ	206Pb/	2σ	%conc
	used					(after Hg corr)	on 204 cps	on 204 cps	204Pb cps	radiogenic			235U	±	238U	±	corr.	206Pb	±	206Pb	±	235U	±	238U	±
Mount Ephraim Block - Mount Ephraim Plutonic Suite: Sample M9-19CW-020
19CW-020 - 1		5.76599e+07	201	174	1.15517	1	12	1200	18050	99.41	1	FALSE	1.085	0.033	0.1195	0.0016	0.36158	0.0662	0.0019	796	60	746	16	727.9	9.5	97.5737
19CW-020 - 2	1	5.73355e+07	381.5	316.6	1.20499	10	13	130	3693.83	99.755	1	FALSE	1.111	0.025	0.12483	0.0016	0.36171	0.0647	0.0014	773	44	758.7	12	758.3	9.4	99.9473
19CW-020 - 3	1	5.61367e+07	220	167.1	1.31658	12	10	83.3333	1730	99.52	1	FALSE	1.126	0.032	0.1246	0.0019	0.42781	0.0661	0.0017	807	55	768	15	756.6	11	98.5156
19CW-020 - 4		5.76107e+07	213	150.3	1.41717	10	11	110	2066	99.771	1	FALSE	1.056	0.028	0.12439	0.0016	0.23123	0.0621	0.0016	665	56	730	14	755.7	9.3	103.521
19CW-020 - 5		5.7962e+07	255.1	121.4	2.10132	30	12	40	532.667	95.45	1	FALSE	1.042	0.029	0.0832	0.0032	0.17509	0.0937	0.0039	1473	81	725	15	515	19	71.0345
19CW-020 - 6		5.72738e+07	415.2	423.8	0.979707	15.7	9.9	63.0573	2466.88	99.654	1	FALSE	1.099	0.023	0.12132	0.0015	0.19687	0.06603	0.0013	804	40	751.9	11	738.1	8.7	98.1646
19CW-020 - 7	1	5.69256e+07	227.5	222.8	1.0211	7.1	9.7	136.62	3035.21	99.667	1	FALSE	1.103	0.025	0.12219	0.0016	0.17128	0.0656	0.0015	789	46	753.8	12	743.1	9.3	98.5805
19CW-020 - 8		5.51027e+07	200	256.4	0.780031	24	13	54.1667	760	96.91	1	FALSE	1.456	0.039	0.1194	0.0017	0.35098	0.0883	0.0021	1381	45	911	16	727.9	10	79.9012
19CW-020 - 9		5.71932e+07	322	467	0.689507	108	15	13.8889	301.188	92.81	-	3	1.12	0.14	0.117	0.0023	0.71437	0.0676	0.0083	1320	140	741	73	713.1	13	96.2348
19CW-020 - 10		5.36935e+07	306.4	236.8	1.29392	0	12	#DIV/0!	22984.4	98.42	1	FALSE	1.04	0.024	0.1032	0.0018	0.043985	0.0737	0.0019	1038	53	722.6	12	633.1	10	87.6142
19CW-020 - 11		5.72284e+07	368.5	594	0.62037	33	12	36.3636	1024.85	98.02	1	FALSE	1.346	0.035	0.1216	0.0017	0.013553	0.08	0.0021	1193	51	866	15	739.5	9.5	85.3926
19CW-020 - 12		5.68073e+07	743	987	0.752786	51	15	29.4118	1151.57	98.1	1	FALSE	1.124	0.022	0.106	0.0016	0.50988	0.07656	0.0014	1110	36	764.9	11	649.5	9.1	84.9131
19CW-020 - 13		5.75863e+07	376.5	513	0.733918	68	14	20.5882	514.118	96.19	1	FALSE	1.618	0.05	0.12391	0.0016	0.12204	0.0951	0.0031	1503	61	976	19	753	9	77.1516
19CW-020 - 14		5.93638e+07	342.7	360.7	0.950097	4	11	275	7861.41	99.3	1	FALSE	1.143	0.026	0.11997	0.0016	0.17074	0.069	0.0015	891	44	773.5	12	730.4	9	94.4279
19CW-020 - 15		5.58201e+07	1109	2020	0.54901	72	12	16.6667	1300.73	98.57	1	FALSE	1.202	0.042	0.1159	0.0017	0.831	0.0744	0.0019	1040	53	799	19	706.7	9.8	88.4481
19CW-020 - 16		5.30759e+07	2278	3710	0.614016	55	14	25.4545	3262.92	99.503	1	FALSE	1.122	0.022	0.11951	0.0015	0.70579	0.06785	0.0011	862	34	763.9	11	727.7	8.5	95.2612
19CW-020 - 17		5.03525e+07	1843	3722	0.495164	117	20	17.094	1076.18	97.922	-	3	0.978	0.065	0.10916	0.0015	0.43325	0.065	0.0042	832	120	688	34	667.8	8.6	97.064
19CW-020 - 18		5.13661e+07	374.7	435	0.861379	94	18	19.1489	242.57	89.78	1	FALSE	1.874	0.069	0.097	0.0019	0.29268	0.1422	0.005	2269	59	1071	24	596.7	11	55.7143
19CW-020 - 19		5.27917e+07	898	1072	0.837687	437	30	6.86499	82.1659	74.73	-	3	0.49	0.14	0.0481	0.0014	0.72661	0.074	0.022	1810	260	376	110	303.3	8.7	80.6649
19CW-020 - 20		5.56188e+07	543	579	0.937824	27	15	55.5556	1662.54	99.11	1	FALSE	1.222	0.026	0.12357	0.0017	0.21415	0.0713	0.0015	961	42	810.9	11	751.5	9.4	92.6748
19CW-020 - 21	1	5.64776e+07	332.2	338.3	0.981969	-2	12	-600	27700	99.57	1	FALSE	1.109	0.028	0.12301	0.0016	0.22374	0.0656	0.0016	784	51	757	13	747.8	9.4	98.7847
19CW-020 - 22		5.61695e+07	332.6	408	0.815196	-9	11	-122.222	26220	99.06	1	FALSE	1.155	0.03	0.11983	0.0016	0.10905	0.0701	0.0018	926	53	778	14	730	9.2	93.8303
19CW-020 - 23		5.60265e+07	648	1355	0.478229	44	14	31.8182	1079.32	97.46	1	FALSE	1.271	0.031	0.11178	0.0016	0.73661	0.0826	0.0016	1260	38	833	14	683	9	81.9928
19CW-020 - 24	1	5.68615e+07	485.7	576	0.843229	8	12	150	5168.41	99.628	1	FALSE	1.141	0.026	0.12531	0.0015	0.16564	0.0662	0.0014	807	46	772.1	12	761	8.7	98.5624
19CW-020 - 25		5.62099e+07	780	881	0.885358	25	13	52	2359.59	98.95	1	FALSE	1.147	0.024	0.11643	0.0015	0.29802	0.07178	0.0014	978	39	776.6	11	709.9	8.9	91.4113
19CW-020 - 26		5.42797e+07	259.4	350.9	0.739242	22	14	63.6364	924.545	96.47	1	FALSE	1.594	0.038	0.1244	0.0017	0.19271	0.0929	0.0021	1479	44	967	15	755.7	9.9	78.1489
19CW-020 - 27		5.56895e+07	692.9	631.9	1.09653	255	21	8.23529	155.804	87.03	-	3	0.75	0.14	0.0806	0.0017	0.60784	0.0663	0.012	1490	210	572	84	499.4	10	87.3077
19CW-020 - 28		5.75545e+07	503.7	525.6	0.958333	7	12	171.429	5550	99.19	1	FALSE	1.121	0.024	0.11651	0.0014	0.18629	0.06979	0.0014	923	41	762.8	11	710.4	8.3	93.1306
19CW-020 - 29	1	5.76532e+07	432.9	366.6	1.18085	2	11	550	17650	99.784	1	FALSE	1.087	0.024	0.12279	0.0015	0.10051	0.06422	0.0013	739	45	748	12	746.6	8.5	99.8128
19CW-020 - 30		5.75946e+07	404.2	422	0.95782	36	13	36.1111	791.389	98.2	1	FALSE	1.094	0.026	0.10472	0.0013	0.013567	0.0758	0.0017	1092	46	751.3	12	642	7.6	85.4519
19CW-020 - 31		4.72865e+07	189.8	169.1	1.12241	32	14	43.75	344.062	93.34	1	FALSE	1.622	0.073	0.1064	0.0027	0.33227	0.1142	0.0064	1849	100	977	27	651	16	66.6325
19CW-020 - 32	1	5.5397e+07	1165	1860	0.626344	24	12	50	4079.8	99.796	1	FALSE	1.124	0.027	0.1249	0.0026	0.8135	0.0653	0.0011	783	37	764.6	13	759	15	99.2676
19CW-020 - 33		5.73963e+07	243.7	302.5	0.80562	-3	11	-366.667	20210	99.43	1	FALSE	1.076	0.027	0.1175	0.0017	0.20699	0.0662	0.0017	809	52	742	13	715.9	9.7	96.4825
19CW-020 - 34		5.51307e+07	269	381	0.706037	1	10	1000	23951.5	99.11	1	FALSE	1.208	0.03	0.1229	0.0017	0.4021	0.0713	0.0016	967	48	803	14	746.9	9.7	93.0137
19CW-020 - 35		5.74465e+07	312.6	380.3	0.821983	12	11	91.6667	2233.33	99.67	1	FALSE	1.035	0.023	0.1177	0.0015	0.05327	0.0642	0.0015	744	49	722.5	12	717.3	8.8	99.2803
19CW-020 - 36		5.51793e+07	329.7	340.7	0.967714	31	10	32.2581	794.516	98.64	1	FALSE	1.061	0.026	0.10581	0.0014	0.21426	0.0722	0.0016	1000	48	733.7	13	648.3	8.3	88.3604
19CW-020 - 37		5.64522e+07	305.4	348	0.877586	11	11	100	2485.45	99.525	1	FALSE	1.093	0.027	0.12015	0.0016	0.21358	0.0659	0.0015	800	49	748.5	13	731.9	9	97.7822
19CW-020 - 38		5.51539e+07	393.4	511	0.769863	48	13	27.0833	714.167	97.31	1	FALSE	1.351	0.043	0.11632	0.0015	0.4179	0.0849	0.0025	1315	58	871	19	709.3	8.6	81.4351
19CW-020 - 39		5.42849e+07	369.6	451.3	0.818967	76	18	23.6842	418.816	93.58	1	FALSE	1.776	0.092	0.11524	0.0015	0.19737	0.1136	0.0058	1803	97	1031	35	702.4	9.1	68.128
19CW-020 - 40		5.51308e+07	541.3	560.7	0.9654	-3	11	-366.667	49260	99.524	1	FALSE	1.083	0.022	0.11797	0.0016	0.057309	0.06649	0.0013	827	41	744.4	11	718.8	9.2	96.561
Mount Ephraim Block - Gunshot Brook pluton: Sample M14-19CW-035
19CW-035 - 1		5.53997e+07	159.4	58.5	2.72479	-3	12	-400	14890	99.666	1	FALSE	0.975	0.034	0.1163	0.0025	0.58704	0.0614	0.0017	656	63	688	17	710	15	103.198
19CW-035 - 2		5.58695e+07	264.2	112.5	2.34844	8	10	125	2918.75	98.39	1	FALSE	1.099	0.036	0.1068	0.0018	0.38473	0.0741	0.0022	1036	59	751	17	654.1	10	87.0972
19CW-035 - 3	1	5.58819e+07	161.3	127.7	1.26312	5	11	220	2778	99.52	1	FALSE	0.853	0.024	0.10232	0.0014	0.075431	0.0609	0.0018	635	66	627	14	628	8	100.159
19CW-035 - 4	1	5.53735e+07	64.01	50.1	1.27764	-9	11	-122.222	5541	99.55	1	FALSE	0.891	0.037	0.1032	0.0016	0.10332	0.0619	0.0025	675	90	645	20	632.9	9.6	98.124
19CW-035 - 5		5.6733e+07	76.2	38.23	1.9932	6	11	183.333	1298.33	98.93	1	FALSE	1.122	0.053	0.1187	0.0024	0.38909	0.0692	0.0029	884	88	756	25	723	14	95.6349
19CW-035 - 6	1	5.64831e+07	158.6	45.96	3.45083	6.2	8	129.032	2362.9	99.63	1	FALSE	0.852	0.025	0.103	0.0014	0.0095946	0.0597	0.0018	587	64	625	14	631.9	8.2	101.104
19CW-035 - 7		5.65131e+07	169.7	44.49	3.81434	14	12	85.7143	1101.43	97.42	1	FALSE	1.135	0.03	0.10044	0.0014	0.03993	0.0814	0.0021	1222	53	768	15	616.9	8.2	80.3255
19CW-035 - 8		5.60133e+07	50.3	27.8	1.80935	-14.1	9.9	-70.2128	6300	99.91	1	FALSE	1.104	0.051	0.1355	0.0035	0.28402	0.0604	0.0026	579	96	752	25	820	20	109.043
19CW-035 - 9	1	5.65728e+07	79.7	24.1	3.30705	-4	12	-300	7610	99.39	1	FALSE	0.887	0.033	0.1027	0.0016	0.092404	0.0622	0.0023	650	80	642	18	630.3	9.6	98.1776
19CW-035 - 10		5.73811e+07	302.4	172.7	1.75101	6	13	216.667	4831.67	99.56	1	FALSE	0.883	0.021	0.10042	0.0013	0.34046	0.0631	0.0014	699	47	641.7	11	616.8	7.7	96.1197
19CW-035 - 11	1	5.72247e+07	303.7	185.2	1.63985	-6	11	-183.333	29640	99.743	1	FALSE	0.862	0.019	0.102	0.0013	0.029863	0.06101	0.0013	635	47	631.4	10	626.1	7.3	99.1606
19CW-035 - 12		5.63178e+07	77.8	45.34	1.71592	5	11	220	1750	99.5	1	FALSE	1.07	0.035	0.1195	0.0019	0.15315	0.0644	0.0021	754	71	740	18	727.3	11	98.2838
19CW-035 - 13		5.09634e+07	108.4	82	1.32195	-4.1	9.3	-226.829	11400	99.57	1	FALSE	1.093	0.031	0.123	0.0018	0.064337	0.0644	0.002	767	64	752	15	748.4	10	99.5213
19CW-035 - 14		5.57993e+07	74.43	67.19	1.10775	9	10	111.111	762.222	99.93	1	FALSE	0.796	0.033	0.0999	0.0015	0.05614	0.0577	0.0025	481	93	592	19	613.6	9	103.649
19CW-035 - 15	1	5.35864e+07	378	230.2	1.64205	-1	12	-1200	34460	99.55	1	FALSE	0.865	0.022	0.10201	0.0013	0.11151	0.0618	0.0016	673	56	631.8	12	626.1	7.6	99.0978
19CW-035 - 16		5.55864e+07	306.5	198.6	1.5433	-8	12	-150	30150	99.758	1	FALSE	0.891	0.022	0.10632	0.0014	0.058029	0.0608	0.0015	627	52	646.7	12	651.3	8	100.711
19CW-035 - 17		5.42141e+07	203.1	88	2.30795	-5.1	9.9	-194.118	18080	99.31	1	FALSE	0.91	0.024	0.10218	0.0013	0.24694	0.065	0.0016	777	52	656.7	13	627.1	7.9	95.4926
19CW-035 - 18		5.53805e+07	150.2	45.8	3.27948	-8.9	9.3	-104.494	13420	99.03	1	FALSE	0.947	0.027	0.10164	0.0014	0.081706	0.0674	0.0019	836	59	675	14	623.9	8.2	92.4296
19CW-035 - 19		5.53996e+07	101.8	95.4	1.06709	1	11	1100	11090	98.59	1	FALSE	1.25	0.046	0.1222	0.0021	0.49282	0.0745	0.0023	1047	66	828	21	742.8	12	89.7101
19CW-035 - 20		5.31713e+07	299	214.9	1.39134	460	29	6.30435	77.8753	75.8	-	3	0.96	0.21	0.11	0.002	0.85672	0.061	0.014	1460	180	730	93	672.3	11	92.0959
19CW-035 - 21		5.71334e+07	234	95.7	2.44514	3.3	9.8	296.97	6181.82	99.686	1	FALSE	0.847	0.024	0.10016	0.0013	0.1468	0.0605	0.0016	633	59	621	13	615.3	7.4	99.0821
19CW-035 - 22		5.60446e+07	158	56.5	2.79646	-11	11	-100	13953.8	99.49	1	FALSE	0.913	0.038	0.108	0.003	0.66137	0.0618	0.002	657	70	656	19	661	17	100.762
19CW-035 - 23		5.49973e+07	217.2	94.7	2.29356	8	11	137.5	2177.5	99.64	1	FALSE	0.842	0.022	0.1001	0.0013	0.015923	0.0609	0.0016	640	56	619.9	12	614.9	7.6	99.1934
19CW-035 - 24		5.58307e+07	75.2	50	1.504	7.1	9.1	128.169	832.394	99.65	1	FALSE	0.81	0.032	0.0988	0.0017	0.062047	0.0592	0.0023	581	82	604	18	607.3	9.9	100.546
19CW-035 - 25		5.63927e+07	168.7	56.23	3.00018	18	12	66.6667	747.778	99.18	1	FALSE	0.955	0.03	0.10416	0.0015	0.20381	0.0662	0.002	798	63	680	16	638.7	8.6	93.9265
19CW-035 - 26		5.45615e+07	173.1	233	0.742918	25	13	52	523.2	95.98	1	FALSE	1.36	0.14	0.1011	0.0019	0.88259	0.0935	0.0077	1340	120	826	47	620.7	11	75.1453
19CW-035 - 27		5.17247e+07	198.2	86	2.30465	42	12	28.5714	323.571	93.53	1	FALSE	1.69	0.1	0.1098	0.002	0.79452	0.1127	0.0059	1840	100	999	39	671.5	11	67.2172
19CW-035 - 28	1	5.50387e+07	191.5	51.8	3.69691	7	11	157.143	1754.29	99.38	1	FALSE	0.866	0.031	0.10306	0.0014	0.019654	0.0613	0.0022	653	76	634	17	632.3	8	99.7319
19CW-035 - 29		5.53665e+07	376	124.3	3.02494	5	10	200	4546	99.721	1	FALSE	0.817	0.02	0.09923	0.0013	0.046186	0.0596	0.0015	581	52	605.1	11	609.8	7.6	100.777
19CW-035 - 30		5.35007e+07	287.9	138.3	2.08171	41	13	31.7073	409.024	95.3	1	FALSE	1.431	0.075	0.10536	0.0014	0.33847	0.0981	0.0048	1581	93	897	31	645.7	8.2	71.9844
19CW-035 - 31		5.19426e+07	2410	143	16.8531	427	58	13.5831	281.594	86.7	-	3	0.95	0.12	0.0989	0.0025	0.74842	0.0717	0.0093	1130	140	695	51	607.5	15	87.4101
19CW-035 - 32		3.45375e+07	180.4	53	3.40377	40	11	27.5	169.5	91.26	1	FALSE	2.161	0.079	0.1162	0.0018	0.22986	0.1328	0.0045	2151	60	1167	25	709.3	10	60.7798
19CW-035 - 33	1	5.4871e+07	120	87.4	1.373	-6	11	-183.333	5590	99.45	1	FALSE	0.896	0.037	0.1038	0.0018	0.093518	0.0628	0.0026	680	94	655	19	636.5	11	97.1756
19CW-035 - 34		5.42255e+07	37.2	24	1.55	4	11	275	399.75	100.37	1	FALSE	0.823	0.072	0.1054	0.0034	0.09405	0.0573	0.0051	440	170	616	40	645	20	104.708
19CW-035 - 35		5.34202e+07	923	630	1.46508	1090	100	9.17431	46.5849	60.1	-	3	1.17	0.24	0.1004	0.0029	0.74368	0.086	0.017	1760	230	780	110	616	17	78.9744
19CW-035 - 36		5.42337e+07	228.6	35.1	6.51282	-6.1	9.7	-159.016	8150	99.55	1	FALSE	0.889	0.034	0.1055	0.0016	0.32875	0.0607	0.0022	621	76	646	18	646.4	9.5	100.062
19CW-035 - 37	1	5.41741e+07	352	94	3.74468	13	11	84.6154	855.385	99.57	1	FALSE	0.87	0.029	0.1036	0.0015	0.29252	0.0611	0.0019	648	65	634	16	635.4	8.8	100.221
19CW-035 - 38		5.32801e+07	423.4	256	1.65391	12.7	9.8	77.1654	896.85	98.9	1	FALSE	0.951	0.032	0.10135	0.0014	0.12841	0.0686	0.0023	860	69	680	17	622.3	8	91.5147
19CW-035 - 39		5.37384e+07	214	69	3.10145	8.7	8.8	101.149	728.736	100.02	1	FALSE	1.057	0.059	0.1341	0.0059	0.40312	0.0597	0.0031	570	110	738	29	809	33	109.621
19CW-035 - 40		5.28446e+07	2059	1410	1.46028	180	23	12.7778	229.863	91.84	-	3	0.891	0.093	0.09732	0.0018	0.79217	0.0655	0.0064	1120	130	630	55	598.6	11	95.0159
Mount Ephraim Block - Dalhousie Mountain Formation: Sample M4-19CW-057
CW19-057 - 1		1.18538e+08	293	228	1.28509	3	13	433.333	8906.67	99.61	1	FALSE	1.059	0.024	0.11883	0.0016	0.26051	0.0647	0.0014	764	44	733	12	723.8	9	98.7449
CW19-057 - 2		1.31359e+08	690.6	196.9	3.50736	19	16	84.2105	3683.68	99.712	1	FALSE	1.125	0.019	0.12336	0.0015	0.038389	0.06619	0.00099	812	32	766.4	8.8	749.9	8.6	97.8471
CW19-057 - 3	2	1.17009e+08	149.4	65.1	2.29493	13	15	115.385	1168.89	99.688	1	FALSE	1.125	0.029	0.1276	0.0019	0.13194	0.0637	0.0016	710	54	765	14	774	11	101.176
CW19-057 - 4		1.17407e+08	751.7	367.9	2.04322	20	16	80	3589.51	99.14	1	FALSE	1.225	0.019	0.12469	0.0015	0.33643	0.07134	0.00092	965	27	812.2	8.8	757.5	8.5	93.2652
CW19-057 - 5		1.17242e+08	130.7	67.97	1.92291	-9	17	-188.889	12220	99.43	1	FALSE	1.103	0.037	0.1228	0.0018	0.13291	0.0655	0.0021	757	72	751	18	746.7	10	99.4274
CW19-057 - 6		1.22225e+08	711.9	233.4	3.05013	77	20	25.974	913.117	97.7	-	3	1.119	0.078	0.12253	0.0022	0.72209	0.0663	0.0039	928	96	768	38	745.1	13	97.0182
CW19-057 - 7		1.19039e+08	251.3	222.7	1.12842	15	14	93.3333	1581.33	99.601	1	FALSE	1.095	0.022	0.12149	0.0016	0.049072	0.0649	0.0013	764	44	750.8	11	739.1	9	98.4417
CW19-057 - 8		1.18328e+08	366	332.4	1.10108	11	16	145.455	9674.51	100	1	FALSE	6.441	0.077	0.3727	0.0045	0.31121	0.12496	0.00096	2027	14	2037.3	10	2042.1	21	101.245
CW19-057 - 9	1	1.15633e+08	148.8	118.4	1.25676	-1	15	-1500	14230	99.48	1	FALSE	1.11	0.029	0.1239	0.0018	0.033039	0.0652	0.0017	791	55	757	14	752.9	10	99.4584
CW19-057 - 10		1.14459e+08	99.5	71.4	1.39356	15	15	100	603.333	99.4	1	FALSE	1.104	0.04	0.1213	0.0019	0.1075	0.0652	0.0024	759	81	751	20	738.2	11	98.2956
CW19-057 - 11		1.17887e+08	16.99	6.79	2.50221	6	14	233.333	436.167	98.78	1	FALSE	2.16	0.13	0.2022	0.0052	0.16951	0.0782	0.0048	1110	120	1161	42	1186	28	108.874
CW19-057 - 12	1	136919238	977.4	322.7	3.02882	7	24	342.857	14648.1	99.928	1	FALSE	1.092	0.017	0.12434	0.0016	0.080771	0.06354	0.00089	728	30	749.3	8.1	755.5	9.3	100.827
CW19-057 - 13	1	1.26382e+08	1126	432	2.60648	-12	15	-125	114504	99.891	1	FALSE	1.092	0.018	0.12385	0.0016	0.2717	0.06368	0.00083	741	26	749	8.5	752.6	8.9	100.481
CW19-057 - 14		1.1835e+08	1103.3	440.9	2.50238	6	16	266.667	16915.5	99.566	1	FALSE	1.099	0.014	0.11864	0.0014	0.27549	0.06698	0.00058	835	18	752.5	6.9	722.7	8.2	96.0399
CW19-057 - 15	2	1.23557e+08	554	193.8	2.85862	13	15	115.385	4328.94	99.847	1	FALSE	1.126	0.019	0.1273	0.0018	0.27185	0.06473	0.00094	763	31	765.1	9.2	772.2	10	100.928
CW19-057 - 16	1	1.12366e+08	161.1	70.66	2.27993	13	16	123.077	1132.31	99.49	1	FALSE	1.1	0.03	0.12343	0.0017	0.085425	0.0648	0.0018	760	57	752	15	750.2	9.7	99.7606
CW19-057 - 17		1.16903e+08	404.1	144.4	2.79848	126	16	12.6984	479.206	96.68	-	3	2	0.13	0.1888	0.0033	0.50723	0.0764	0.0044	1160	110	1111	48	1114.9	18	106.281
CW19-057 - 18	2	1.1608e+08	399	140.4	2.84188	-1	15	-1500	40410.2	99.842	1	FALSE	1.104	0.022	0.12684	0.0016	0.23745	0.063	0.0011	704	39	755.4	10	769.8	9.4	101.906
CW19-057 - 19	2	1.1862e+08	416.6	160.1	2.60212	2	14	700	20650	99.856	1	FALSE	1.122	0.022	0.1265	0.0016	0.26973	0.0639	0.001	746	34	764.9	10	767.8	9.3	100.379
CW19-057 - 20		1.17455e+08	49.78	36.22	1.37438	1	13	1300	4644	99.58	1	FALSE	1.087	0.043	0.12	0.0022	0.14367	0.0645	0.0026	730	90	749	22	730	13	97.4633
CW19-057 - 21		1.17285e+08	165.4	126	1.3127	-5	16	-320	15550	99.48	1	FALSE	1.12	0.035	0.1233	0.0019	0.09668	0.0656	0.002	805	62	760	17	749.4	11	98.6053
CW19-057 - 22		1.1817e+08	635.5	149.8	4.24232	-15	12	-80	60782.4	99.839	1	FALSE	1.072	0.016	0.12218	0.0015	0.061046	0.0639	0.00076	740	24	740.8	7.7	743.1	8.5	100.31
CW19-057 - 23		1.18455e+08	172.9	93.16	1.85595	-14	15	-107.143	16080	99.57	1	FALSE	1.085	0.024	0.1197	0.0017	0.26678	0.0655	0.0013	789	42	747	12	729	9.6	97.5904
CW19-057 - 24	1	1.16893e+08	292.5	165.6	1.7663	-4	14	-350	28199.3	99.689	1	FALSE	1.102	0.024	0.12346	0.0016	0.0032269	0.0642	0.0014	781	45	755	12	750.4	9.1	99.3907
CW19-057 - 25		1.17898e+08	182.1	105.7	1.7228	-23	17	-73.913	17130	99.67	1	FALSE	1.047	0.025	0.1198	0.0017	0.078253	0.0631	0.0015	714	53	727	13	729.3	9.7	100.316
CW19-057 - 26	1	1.1863e+08	588	181.2	3.24503	8	13	162.5	7259.64	99.833	1	FALSE	1.083	0.019	0.12348	0.0015	0.2247	0.06331	0.00092	721	31	745.3	8.9	750.9	8.7	100.751
CW19-057 - 27		1.17737e+08	1135	426	2.66432	56	20	35.7143	1936.4	99	-	-	1.066	0.047	0.12031	0.0021	0.68773	0.0645	0.0024	809	68	739	24	732.3	12	99.0934
CW19-057 - 28	1	1.16396e+08	998	321.9	3.10034	-2	17	-850	95960.9	99.881	1	FALSE	1.111	0.016	0.12464	0.0015	0.34124	0.06425	0.00067	753	22	759.1	7.4	757.2	8.8	99.7497
CW19-057 - 29		1.30021e+08	1161	454	2.55727	-11	19	-172.727	114612	99.688	1	FALSE	1.104	0.019	0.12108	0.0016	0.28244	0.0666	0.00082	827	27	754.8	9.3	736.7	9.3	97.602
CW19-057 - 30		1.24228e+08	165.9	55.6	2.98381	-17	26	-152.941	14230	99.25	1	FALSE	1.117	0.055	0.1183	0.0023	0.53221	0.0688	0.0028	893	89	759	26	720	13	94.8617
Mount Ephraim Block - Six Mile Brook pluton: Sample M5-19CW-059
19CW-059 - 13		4.98953e+07	97	42.6	2.277	619	88	14.2165	29.3759	72.4	-	3	11.2	3.8	0.284	0.041	0.95887	0.23	0.053	3390	240	2360	290	1520	180	41.2054
19CW-059 - 1	2	5.91111e+07	63.8	30.4	2.09868	-9	13	-144.444	4450	99.29	1	FALSE	1.112	0.054	0.1231	0.0023	0.033839	0.0662	0.0032	769	100	760	26	748	13	98.4211
19CW-059 - 2	2	5.81288e+07	99.1	55	1.80182	-3	13	-433.333	6550	99.53	1	FALSE	1.075	0.037	0.1235	0.002	0.10104	0.063	0.0022	690	75	741	18	750.6	11	101.296
19CW-059 - 3	1	5.85185e+07	109.21	44.94	2.43013	10	13	130	737	99.52	1	FALSE	1.043	0.037	0.122	0.0018	0.15545	0.0623	0.0023	678	79	725	20	742.1	11	102.359
19CW-059 - 4	1	5.78386e+07	105	68.9	1.52395	13	10	76.9231	545.385	99.5	1	FALSE	1.069	0.04	0.122	0.002	0.20071	0.0637	0.0023	734	76	743	20	741.9	11	99.852
19CW-059 - 5	1	5.53688e+07	100.9	67	1.50597	5	10	200	1328	99.41	1	FALSE	1.097	0.041	0.1224	0.0019	0.12368	0.0641	0.0023	749	79	749	19	744.4	11	99.3858
19CW-059 - 6	1	5.77883e+07	92.7	56.1	1.65241	3	11	366.667	2066.67	99.41	1	FALSE	1.055	0.037	0.1209	0.0019	0.051805	0.0632	0.0023	737	74	729	18	735.4	11	100.878
19CW-059 - 7	1	6.02038e+07	111.4	63.39	1.75737	-7	11	-157.143	8010	99.36	1	FALSE	1.066	0.037	0.1214	0.0017	0.053701	0.0642	0.0022	736	75	736	18	738.5	10	100.34
19CW-059 - 8	2	5.99177e+07	119.9	48.7	2.46201	-2	12	-600	9130	99.5	1	FALSE	1.116	0.038	0.1267	0.0019	0.090833	0.0637	0.0022	719	73	760	19	768.8	11	101.158
19CW-059 - 9	1	5.87136e+07	84.6	49	1.72653	15	12	80	406	99.7	1	FALSE	1.023	0.042	0.1208	0.0021	0.151	0.0613	0.0025	609	89	712	21	735.2	12	103.258
19CW-059 - 10	1	58306354	102.1	65.3	1.56355	7	11	157.143	1027.29	99.51	1	FALSE	1.035	0.041	0.1202	0.0019	0.15992	0.0621	0.0023	659	79	720	20	731.5	11	101.597
19CW-059 - 11	1	5.88942e+07	82.3	52.1	1.57965	1	12	1200	6101	99.57	1	FALSE	1.069	0.043	0.1224	0.0021	0.085943	0.0625	0.0025	669	86	737	21	744.8	12	101.058
19CW-059 - 12		5.90465e+07	56.3	26.9	2.09294	-6.6	8.8	-133.333	4181	99.86	1	FALSE	1.017	0.049	0.124	0.0022	0.14415	0.0595	0.0029	575	100	712	24	753.2	12	105.787
19CW-059 - 14	2	6.14642e+07	74.7	38.9	1.92031	12	11	91.6667	502.5	99.38	1	FALSE	1.121	0.048	0.1276	0.0025	0.19657	0.0634	0.0025	730	86	769	23	774	14	100.65
19CW-059 - 15	1	6.06741e+07	122.5	102.7	1.19279	3	12	400	3163.33	99.47	1	FALSE	1.043	0.034	0.1198	0.0017	0.11907	0.0639	0.002	732	67	726	17	729.3	9.8	100.455
19CW-059 - 16		5.95756e+07	146	128	1.14062	-6	13	-216.667	10660	99.48	1	FALSE	1.04	0.031	0.1172	0.0017	0.049252	0.0642	0.0019	737	66	722	15	714.5	10	98.9612
19CW-059 - 17	1	5.93039e+07	95.4	66.5	1.43459	12.4	9.1	73.3871	607.258	99.59	1	FALSE	1.045	0.042	0.1197	0.0018	0.060017	0.0633	0.0026	699	90	723	21	728.6	10	100.775
19CW-059 - 18	2	5.96505e+07	55.45	28.78	1.92669	6	11	183.333	773.333	99.47	1	FALSE	1.103	0.046	0.1249	0.0022	0.16563	0.0644	0.0027	715	93	751	23	758.7	13	101.025
19CW-059 - 19	2	5.84951e+07	83.3	44.9	1.85523	-6	12	-200	7160	99.33	1	FALSE	1.098	0.045	0.1233	0.002	0.063211	0.0649	0.0027	759	84	751	21	749.3	11	99.7736
19CW-059 - 20	1	5.81292e+07	72.6	43.1	1.68445	0	10	na	5850	99.45	1	FALSE	1.049	0.039	0.1199	0.002	0.21901	0.0636	0.0022	709	77	730	20	729.9	11	99.9863
19CW-059 - 21	1	5.93798e+07	107.4	66.8	1.60778	-9	10	-111.111	8720	99.56	1	FALSE	1.038	0.033	0.1203	0.0017	0.064184	0.0625	0.002	683	66	721	16	732.3	9.8	101.567
19CW-059 - 22	2	5.90516e+07	64.73	27.96	2.31509	1	11	1100	5540	99.6	1	FALSE	1.076	0.043	0.1253	0.0023	0.1566	0.0622	0.0026	647	87	746	21	761	13	102.011
19CW-059 - 23	1	5.80047e+07	73.1	43.61	1.67622	7	13	185.714	850	99.49	1	FALSE	1.047	0.039	0.1194	0.0019	0.042967	0.0637	0.0024	730	80	729	20	727.5	11	99.7942
19CW-059 - 24	1	5.89795e+07	93.1	54.6	1.70513	3	11	366.667	2620	99.46	1	FALSE	1.026	0.035	0.1197	0.0018	0.014875	0.0624	0.0022	667	75	715	17	728.7	11	101.916
19CW-059 - 25		5.8223e+07	45.76	23.05	1.98525	7	9.2	131.429	580	99.87	1	FALSE	1.05	0.05	0.1262	0.0022	0.062504	0.0606	0.003	592	100	731	26	765.8	12	104.761
19CW-059 - 26	1	5.84395e+07	89.83	41.6	2.15937	9	10	111.111	858.889	99.37	1	FALSE	1.068	0.038	0.1214	0.0018	0.033189	0.0642	0.0023	752	74	734	19	738.8	10	100.654
19CW-059 - 27	1	5.63497e+07	67.88	42.37	1.60208	5	12	240	1120	99.56	1	FALSE	1.059	0.051	0.1188	0.0021	0.27048	0.0642	0.0029	731	96	734	25	723.4	12	98.5559
19CW-059 - 28	2	5.59111e+07	66.44	37.16	1.78794	24	12	50	243.875	99.01	1	FALSE	1.188	0.054	0.1276	0.0022	0.12743	0.0683	0.0031	859	94	799	25	774.8	12	96.9712
19CW-059 - 29	1	5.7718e+07	88	58.6	1.50171	5.1	8.9	174.51	1488.24	99.4	1	FALSE	1.065	0.037	0.1204	0.002	0.069504	0.0653	0.0023	769	72	734	18	733.6	11	99.9455
19CW-059 - 30	1	5.74899e+07	73.86	46.25	1.59697	-12	12	-100	6396	99.46	1	FALSE	1.076	0.038	0.1216	0.002	0.23912	0.0643	0.0022	743	69	747	19	739.8	11	99.0361
19CW-059 - 31		5.85502e+07	118.5	41	2.89024	6	11	183.333	1933.65	99.807	1	FALSE	1.105	0.033	0.1301	0.0019	0.09478	0.0613	0.0018	667	60	755	16	788.5	11	104.437
19CW-059 - 32	1	5.72054e+07	64.73	36.23	1.78664	-8	12	-150	5497	99.43	1	FALSE	1.037	0.043	0.1187	0.002	0.1403	0.0629	0.0027	687	92	722	22	722.7	12	100.097
19CW-059 - 33	2	5.8271e+07	223.7	221.7	1.00902	-6	11	-183.333	20720	99.52	1	FALSE	1.162	0.031	0.12621	0.0016	0.27603	0.0674	0.0017	849	54	781	14	766.2	9.4	98.105
19CW-059 - 34	1	5.79219e+07	65.2	38.7	1.68475	6	11	183.333	983.333	99.23	1	FALSE	1.094	0.045	0.1216	0.0022	0.23649	0.0653	0.0026	758	85	749	22	740	13	98.7984
19CW-059 - 35		5.80009e+07	111.6	91.6	1.21834	-10	10	-100	9920	99.33	1	FALSE	1.035	0.037	0.1172	0.0017	0.11553	0.0639	0.0023	715	75	719	19	714.1	10	99.3185
19CW-059 - 36	1	5.74927e+07	117.2	92.5	1.26703	13	11	84.6154	796.923	99.38	1	FALSE	1.062	0.032	0.1189	0.0017	0.032549	0.0653	0.002	775	62	732	16	724.6	9.9	98.9891
19CW-059 - 37	2	5.89491e+07	91.7	47.32	1.93787	-2	10	-500	8930	99.39	1	FALSE	1.119	0.04	0.1254	0.0018	0.12614	0.0652	0.0023	746	76	763	19	761.5	10	99.8034
19CW-059 - 38		5.65731e+07	72.7	36.31	2.0022	5	13	260	1370	99.06	1	FALSE	1.181	0.05	0.1241	0.0021	0.12411	0.0679	0.0028	856	83	791	23	753.9	12	95.3097
19CW-059 - 39		5.76006e+07	63.3	31.2	2.02885	-11	10	-90.9091	6240	99.72	1	FALSE	1.068	0.04	0.1298	0.002	0.10845	0.0602	0.0022	611	76	739	19	786.7	12	106.455
19CW-059 - 40	2	5.71412e+07	58.1	20	2.905	-3.1	9.6	-309.677	5600	99.26	1	FALSE	1.13	0.051	0.1249	0.0022	0.0094317	0.0659	0.003	750	100	767	25	758	13	98.8266
Jeffers Block - Western - Jeffers Brook pluton: Sample JW7-14TM0040
14TM0040-02		111800000	461	83.2	0.180477	-4	16	-400	-6200	99.59	1	FALSE	0.788	0.022	0.09494	0.0018	0.25911	0.0601	0.0015	588	55	589	13	584.6	10	99.253
14TM0040-03	1	114600000	337	163.5	0.485163	6	17	283.333	3400	99.66	1	FALSE	0.855	0.028	0.1026	0.002	0.29721	0.0602	0.0017	583	64	625	15	629.8	12	100.768
14TM0040-04		113800000	179.6	161	0.896437	-25	16	-64	-366	98.97	1	FALSE	0.823	0.031	0.0916	0.0026	0.12633	0.0651	0.0025	754	87	609	18	565	15	92.775
14TM0040-05	2	116000000	129.4	102.4	0.791345	-14	19	-135.714	-530	99.69	1	FALSE	0.807	0.04	0.098	0.0022	0.019565	0.0598	0.0029	560	110	599	23	602.8	13	100.634
14TM0040-06	1	115000000	99	60.2	0.608081	17	14	82.3529	341.765	99.89	1	FALSE	0.804	0.043	0.1003	0.0022	0.089061	0.0578	0.003	500	110	601	22	615.7	13	102.446
14TM0040-07	2	114200000	105.88	68.64	0.648281	-5	16	-320	-1204	99.62	1	FALSE	0.816	0.037	0.0989	0.0022	0.060812	0.0603	0.0029	570	100	604	22	607.5	13	100.579
14TM0040-08	2	114500000	91.6	65.1	0.710699	-16	17	-106.25	-325.625	99.96	1	FALSE	0.777	0.043	0.0989	0.0025	0.22259	0.0578	0.0033	450	110	577	24	608	15	105.373
14TM0040-09	1	113700000	217.2	124.7	0.574125	5	19	380	2546	99.71	1	FALSE	0.829	0.029	0.101	0.0023	0.30512	0.0592	0.0018	558	67	611	16	619.8	13	101.44
14TM0040-10	2	113500000	507.3	384.1	0.757146	-5	17	-340	-5644	99.67	1	FALSE	0.806	0.022	0.09695	0.0018	0.14252	0.0603	0.0015	591	55	599	12	596.5	10	99.5826
14TM0040-11		123200000	137.6	68	0.494186	-8	19	-237.5	-968.75	98.84	1	FALSE	0.891	0.052	0.0956	0.0025	0.11046	0.0669	0.0039	800	130	642	28	588	14	91.5888
14TM0040-12	2	114900000	131.9	86	0.652009	-12	16	-133.333	-623.333	99.62	1	FALSE	0.801	0.035	0.097	0.0022	0.091263	0.06	0.0026	554	92	593	20	596.8	13	100.641
14TM0040-18	2	112400000	212.5	171.8	0.808471	-3	18	-600	-3950	99.63	1	FALSE	0.815	0.026	0.0978	0.0021	0.048627	0.0606	0.0019	606	67	603	15	601.2	12	99.7015
14TM0040-19	2	112500000	118.6	84.1	0.709106	-5	18	-360	-1294	99.56	1	FALSE	0.811	0.041	0.0963	0.0023	0.027633	0.0615	0.0033	580	110	597	23	592	14	99.1625
14TM0040-20	2	110000000	133.8	77.6	0.57997	-23	16	-69.5652	-316.522	99.75	1	FALSE	0.799	0.043	0.0969	0.0022	0.26384	0.0596	0.003	530	110	590	24	595.8	13	100.983
14TM0040-21	2	110800000	106.7	62.66	0.587254	-8	18	-225	-755	99.38	1	FALSE	0.862	0.042	0.0994	0.0023	0.042942	0.0631	0.0031	650	100	626	23	611	14	97.6038
14TM0040-22	2	112800000	78.9	52.16	0.66109	1	20	2000	4410	99.87	1	FALSE	0.778	0.045	0.097	0.0027	0.065262	0.0583	0.0035	480	130	577	25	596	16	103.293
14TM0040-23	1	112500000	136.2	84	0.61674	-7	18	-257.143	-1124.29	99.91	1	FALSE	0.814	0.034	0.1006	0.0021	0.083804	0.0583	0.0023	508	90	601	19	617.7	12	102.779
Jeffers Block - Western - Jeffers Brook pluton: Sample JW8-14TM0106
14TM0106-01	2	111500000	340.8	147.4	0.432512	-16	17	-106.25	-1205.62	99.44	1	FALSE	0.861	0.025	0.0992	0.0019	0.30081	0.0626	0.0015	682	54	629	13	609.8	11	96.9475
14TM0106-02		110000000	726.6	607	0.835398	8	17	212.5	4776.25	99.71	1	FALSE	0.765	0.019	0.09297	0.0017	0.047907	0.0596	0.0012	576	46	575.8	11	573	10	99.5137
14TM0106-04	2	109000000	475	194	0.408421	4	17	425	6825	99.65	1	FALSE	0.86	0.024	0.1027	0.002	0.37391	0.0608	0.0015	614	52	629	13	630.3	11	100.207
14TM0106-05	1	111300000	337.3	103.1	0.305663	17	18	105.882	1094.12	99.63	1	FALSE	0.808	0.024	0.09694	0.0018	0.32307	0.0603	0.0016	591	54	600	13	596.4	11	99.4
14TM0106-06	2	109200000	666.9	396	0.593792	5	17	340	7420	99.651	1	FALSE	0.835	0.019	0.09904	0.0018	0.23507	0.0611	0.0011	631	41	615.7	10	608.7	10	98.8631
14TM0106-07	2	117400000	280.9	130	0.462798	25	19	76	648.4	99.47	1	FALSE	0.852	0.027	0.099	0.002	0.32819	0.0623	0.0018	663	62	624	15	608.7	12	97.5481
14TM0106-08	2	110300000	568	305	0.536972	6	17	283.333	5450	99.669	1	FALSE	0.854	0.024	0.102	0.0021	0.59122	0.0607	0.0013	612	48	625	13	626.2	12	100.192
14TM0106-09	2	113300000	368.4	174.8	0.474484	0	17	na	na	99.63	1	FALSE	0.841	0.023	0.1007	0.0021	0.20833	0.0605	0.0016	599	60	618	13	618.3	13	100.049
14TM0106-10	1	111100000	491	306	0.623218	-2	17	-850	-13160	99.6	1	FALSE	0.795	0.019	0.0956	0.0018	0.16511	0.0601	0.0014	607	46	594.6	10	588.7	11	99.0077
14TM0106-11	1	109300000	393.8	200.4	0.508888	1	18	1800	21690	99.63	1	FALSE	0.815	0.025	0.0985	0.0019	0.32416	0.0598	0.0016	572	59	603	14	605.7	11	100.448
14TM0106-12	1	109500000	339.5	166.3	0.489838	5	16	320	3720	99.79	1	FALSE	0.797	0.027	0.0975	0.0018	0.21697	0.0593	0.0018	548	66	593	15	599.6	11	101.113
14TM0106-14	1	115400000	572	352	0.615385	-12	17	-141.667	-2683.33	99.59	1	FALSE	0.789	0.018	0.0951	0.0019	0.14932	0.0604	0.0013	602	48	589.7	10	585.7	11	99.3217
14TM0106-15	1	110500000	442	288	0.651584	2	18	900	11905	99.57	1	FALSE	0.805	0.021	0.0967	0.0018	0.080048	0.0604	0.0015	597	54	598	12	594.9	11	99.4816
Jeffers Block - Western - New Prospect pluton: Sample JW9-14TM0147
14TM0147-01	2	109300000	234.4	78.3	0.334044	1	18	1800	13090	99.61	1	FALSE	0.83	0.028	0.0997	0.0022	0.039426	0.0606	0.002	597	74	614	16	612.6	13	99.772
14TM0147-02	2	110100000	200.9	64.03	0.318716	18	16	88.8889	634.444	99.74	1	FALSE	0.827	0.03	0.1009	0.0022	0.17204	0.0595	0.002	559	77	611	17	619.5	13	101.391
14TM0147-03	1	111500000	179.8	56.9	0.316463	4	15	375	2430	99.53	1	FALSE	0.804	0.035	0.0964	0.0021	0.096939	0.0608	0.0026	580	92	595	20	593.2	12	99.6975
14TM0147-04	1	110800000	218.6	66.8	0.305581	-5	16	-320	-2378	99.57	1	FALSE	0.788	0.024	0.0958	0.002	0.20429	0.0599	0.0017	571	63	588	14	589.9	11	100.323
14TM0147-05	1	123500000	347	137	0.394813	9	21	233.333	2205.56	99.54	1	FALSE	0.786	0.028	0.0951	0.002	0.21006	0.0599	0.002	576	74	587	16	585.4	12	99.7274
14TM0147-06	1	102800000	271	104.2	0.384502	-13	19	-146.154	-1060.77	99.54	1	FALSE	0.783	0.027	0.0945	0.002	0.27684	0.0603	0.002	587	72	588	16	582	12	98.9796
14TM0147-07	2	109200000	274.6	117.9	0.429352	19	16	84.2105	812.632	99.61	1	FALSE	0.832	0.027	0.0996	0.002	0.12695	0.0606	0.0019	594	66	612	15	612.2	12	100.033
14TM0147-08	1	110300000	269.7	84.9	0.314794	14	21	150	1053.57	99.63	1	FALSE	0.81	0.023	0.0972	0.0019	0.014093	0.0605	0.0017	604	64	603	14	597.8	11	99.1376
14TM0147-09	2	109500000	320.2	116.4	0.363523	7	17	242.857	2601.43	99.79	1	FALSE	0.82	0.024	0.1014	0.002	0.16362	0.059	0.0016	540	61	608	14	622.7	12	102.418
14TM0147-10	1	112300000	333.6	130.3	0.390588	2	17	850	9225	99.59	1	FALSE	0.794	0.024	0.0955	0.0019	0.1346	0.0604	0.0019	589	70	592	14	587.9	11	99.3074
14TM0147-11	1	110100000	552	409	0.740942	-13	17	-130.769	-2304.62	99.6	1	FALSE	0.809	0.02	0.09682	0.0017	0.074421	0.0606	0.0013	609	48	601.1	11	595.7	10	99.1016
14TM0147-12	1	110100000	338.9	133.9	0.395102	-20	16	-80	-926.5	99.46	1	FALSE	0.825	0.025	0.09661	0.0018	0.30546	0.0619	0.0017	646	58	609	14	594.5	11	97.619
14TM0147-13	1	134000000	326.1	126.3	0.387305	-29	21	-72.4138	-688.966	99.64	1	FALSE	0.814	0.038	0.0982	0.0028	0.0092287	0.0602	0.003	580	110	603	21	604	16	100.166
14TM0147-14	1	110800000	293.9	131.7	0.448112	-14	15	-107.143	-1147.86	99.68	1	FALSE	0.792	0.026	0.09688	0.0018	0.052342	0.0592	0.0019	552	71	590	15	596	11	101.017
14TM0147-15	2	109600000	459.1	216.8	0.472228	-1	17	-1700	-26040	99.693	1	FALSE	0.824	0.023	0.0999	0.0019	0.30377	0.0598	0.0014	576	53	609	13	613.7	11	100.772
14TM0147-16	2	109200000	370	112	0.302703	-10	19	-190	-2100	99.56	1	FALSE	0.824	0.024	0.0989	0.0019	0.090734	0.0601	0.0016	592	62	609	14	608.7	12	99.9507
14TM0147-17		110400000	527	215.6	0.409108	-6	15	-250	-4648.33	99.64	1	FALSE	0.765	0.02	0.09342	0.0017	0.084474	0.0594	0.0014	570	55	577.3	11	575.7	9.9	99.7228
14TM0147-18	1	109200000	357.6	183.9	0.514262	8	16	200	2388.75	99.6	1	FALSE	0.784	0.022	0.0952	0.0018	0.031436	0.06	0.0017	577	61	588	13	586.4	11	99.7279
14TM0147-19	2	108200000	306.4	103.5	0.337794	3	16	533.333	5676.67	99.54	1	FALSE	0.837	0.025	0.0992	0.0018	0.080226	0.0614	0.0018	623	65	618	15	609.8	11	98.6731
14TM0147-20	1	107700000	470.9	260.6	0.553408	-18	16	-88.8889	-1413.33	99.63	1	FALSE	0.796	0.02	0.0961	0.0019	0.25163	0.06	0.0013	588	50	593	11	591.5	11	99.747
Mount Ephraim Block - Mount Thom Formation: Sample M1-08TM068A
08TM068A-05		74900000	349	175.4	0.502579	17	13	na	na	na	1	FALSE	1.088	0.021	0.1159	0.0017	0.032605	0.0669	0.0017	839	52	747	10	706.7	9.8	4.86
08TM068A-15		97600000	239	117.5	0.491632	9	32	na	na	na	1	FALSE	1.038	0.042	0.1252	0.0048	0.48965	0.0597	0.0024	584	86	722	21	760	28	4.8
08TM068A-03		66100000	167.4	59.3	0.354241	1	16	na	na	na	1	FALSE	1.117	0.038	0.1281	0.0023	0.26364	0.0635	0.0021	730	70	759	18	777	13	4.5
08TM068A-17		92700000	302	46.3	0.153311	25	20	na	na	na	1	FALSE	1.209	0.046	0.131	0.0042	0.83702	0.067	0.0013	843	39	803	21	793	24	2.81
08TM068A-04		72100000	288	133.1	0.462153	8	16	na	na	na	1	FALSE	1.224	0.03	0.1332	0.0019	0.40908	0.0665	0.0014	814	45	810	13	806	11	3.01
08TM068A-16		85000000	297	109.4	0.36835	13	15	na	na	na	1	FALSE	1.497	0.032	0.1532	0.0019	0.22426	0.0704	0.0015	933	44	928	13	919	10	3.18
08TM068A-01	1	85800000	328	213	0.64939	0	13	na	na	na	1	FALSE	1.595	0.052	0.1617	0.004	0.81779	0.071	0.0013	956	38	973	21	965	22	3.1
08TM068A-19	1	75800000	141	69.5	0.492908	11	18	na	na	na	1	FALSE	1.631	0.036	0.1629	0.002	0.29809	0.0725	0.0016	1013	43	983	14	973	11	3.32
08TM068A-06	1	80300000	341	76.1	0.223167	18	15	na	na	na	1	FALSE	1.693	0.043	0.1681	0.0025	0.81153	0.0741	0.001	1046	27	1004	16	1002	14	2.09
08TM068A-13		74500000	123.2	51.1	0.414773	42	23	na	na	na	1	FALSE	1.784	0.046	0.1742	0.0032	0.44699	0.0747	0.0017	1053	47	1038	17	1035	18	3.53
08TM068A-02		77700000	593	225	0.379427	6	14	na	na	na	1	FALSE	2.043	0.027	0.1825	0.0015	0.52295	0.07991	0.00099	1192	25	1129.5	9.1	1080.8	8.3	3.61
08TM068A-14		90800000	513	501	0.976608	18	19	na	na	na	1	FALSE	2.073	0.033	0.1876	0.0024	0.49395	0.0793	0.0015	1177	39	1140	11	1108	13	3.16
08TM068A-07		70900000	373	73.4	0.196783	-1	19	na	na	na	1	FALSE	2.317	0.045	0.1989	0.0028	0.66439	0.0854	0.0013	1321	29	1217	14	1169	15	3.36
08TM068A-08		55500000	442	83.4	0.188688	40	22	na	na	na	1	FALSE	2.604	0.078	0.2105	0.0062	0.88697	0.0913	0.001	1451	22	1299	22	1230	33	4.89
08TM068A-18		80500000	121.6	113.9	0.936678	2	13	na	na	na	1	FALSE	2.407	0.049	0.2137	0.0034	0.45669	0.0816	0.0016	1236	36	1243	15	1248	18	3.5
08TM068A-11		69200000	77.7	47.5	0.611326	-2	15	na	na	na	1	FALSE	2.428	0.069	0.2263	0.0037	0.1989	0.079	0.0025	1173	59	1251	20	1315	19	6.1
08TM068A-09		109000000	886	982	1.10835	22	16	na	na	na	1	FALSE	3.956	0.06	0.2832	0.0047	0.42012	0.1016	0.0018	1653	33	1625	12	1607	24	2.49
08TM068A-10		71200000	339	155.9	0.459882	-4	14	na	na	na	1	FALSE	5.095	0.055	0.3299	0.0034	0.517	0.1133	0.0013	1851	20	1836.2	9	1838	16	2.57
08TM068A-12		50700000	102.8	46.7	0.45428	-13	14	na	na	na	1	FALSE	6.53	0.17	0.3777	0.0068	0.51492	0.1251	0.0028	2027	40	2048	23	2065	32	2.9
Mount Ephraim Block - Mount Thom Formation: Sample M3-08TM016
08TM016_sp9_Zr10		90000000	343	96.3	0.280758	14	12	na	na	na	1	FALSE	2.22	0.07	0.2023	0.0035	0.69241	0.079	0.0024	1176	23	1186	22	1187	19	2.01
08TM016_sp5_Zr5_1	1	78800000	177.7	58.5	0.329207	-7	12	na	na	na	1	FALSE	2.398	0.073	0.2119	0.0033	0.18483	0.0808	0.0026	1212	29	1241	22	1239	17	2.71
08TM016_sp5_Zr5_2	1	65100000	218.5	74.4	0.340503	-9	13	na	na	na	1	FALSE	2.426	0.073	0.2148	0.0032	0.26102	0.0812	0.0026	1224	30	1249.8	22	1254.5	17	2.41
08TM016_sp1_Zr1_1core	1	97400000	114	86.2	0.75614	8	15	na	na	na	1	FALSE	2.549	0.12	0.2192	0.0054	0.52699	0.0854	0.0036	1313	60	1282	34	1277	29	4.71
08TM016_sp2_Zr2_1		88800000	417.6	351.1	0.840757	37	17	na	na	na	1	FALSE	2.449	0.073	0.2037	0.0037	0.49888	0.0871	0.0028	1362	26	1256.8	22	1195	20	4.46
08TM016_sp4_Zr4_1		102100000	326	188	0.576687	24	20	na	na	na	1	FALSE	3.058	0.11	0.2495	0.0049	0.14965	0.0885	0.0034	1391	49	1426	29	1436	26	3.05
08TM016_sp1_Zr1_2rim		86600000	455	228	0.501099	49	20	na	na	na	1	FALSE	2.734	0.12	0.229	0.0063	0.85183	0.0888	0.003	1395	35	1335	32	1329	33	3.31
08TM016_sp11_Zr12_1		93300000	269.4	252	0.935412	22	16	na	na	na	1	FALSE	5.621	0.17	0.3384	0.0059	0.62246	0.1205	0.0038	1962	24	1919	26	1879	28	3.13
08TM016_sp10_Zr11_1		82000000	339	375	1.10619	10	19	na	na	na	1	FALSE	5.97	0.24	0.3561	0.0082	0.83959	0.1215	0.0039	1976	27	1969	35	1969	37	2.53
Mount Ephraim Block - Mount Ephraim plutonic suite: Sample M6-08TM007
08TM007A_sp1_Zr1_1core	1	89800000	719	759	1.05563	8	12	na	na	na	1	FALSE	1.072	0.05	0.118	0.009	0.58611	0.0652	0.001	774	34	739	11	748.8	9	2.62
08TM007A_sp2_Zr2_1rim	1	102000000	721	980	1.35922	3	15	na	na	na	1	FALSE	1.106	0.039	0.1242	0.0061	0.71422	0.0655	0.0011	776	37	756	11	755	18	3.03
08TM007A_sp2_Zr2_2core	1	88800000	581	870	1.49742	35	14	na	na	na	1	FALSE	1.109	0.043	0.124	0.0062	0.73673	0.0653	0.0011	777	36	759	14	753	17	2.49
08TM007A_sp3_Zr3_1		95600000	614	743	1.2101	23	13	na	na	na	1	FALSE	1.019	0.034	0.1161	0.0052	0.46086	0.0635	0.00084	717	28	713.2	7.4	708.1	6.1	2.24
08TM007A_sp3_Zr3_2	1	90500000	412	390	0.946602	11	11	na	na	na	1	FALSE	1.101	0.038	0.1233	0.0057	0.2554	0.06471	0.00091	752	30	753.2	8.2	749.4	6.2	2.62
08TM007A_sp6_Zr6_2core	1	107000000	351	480	1.36752	8	16	na	na	na	1	FALSE	1.094	0.04	0.1236	0.0061	0.2439	0.0638	0.0014	719	47	750	11	751	11	3.66
08TM007A_sp6_Zr6_3rim		113000000	588	1350	2.29592	45	16	na	na	na	1	FALSE	1.278	0.05	0.1222	0.0058	0.55931	0.0746	0.0016	1055	44	838	16	743	16	7.7
08TM007A_sp6_Zr6_4rim		79300000	343	471	1.37318	25	13	na	na	na	1	FALSE	1.129	0.077	0.1168	0.0054	0.01617	0.0686	0.002	869	60	767	12	712	14	5.1
08TM007A_sp6_Zr6_5rim		82700000	507	494	0.974359	150	25	na	na	na			1.935	0.083	0.1141	0.0057	0.37051	0.1212	0.0024	1970	34	1093	13	696.3	6.6	35.5
08TM007A_sp6_Zr6_6rim		66500000	334	310	0.928144	28	16	na	na	na	1	FALSE	1.171	0.092	0.0979	0.0051	0.6662	0.0851	0.0021	1305	48	789	20	602	13	18.4
08TM007A_sp6_Zr6_7rim		122000000	580.6	896	1.54323	29	19	na	na	na	1	FALSE	1.279	0.056	0.1186	0.007	0.42035	0.077	0.0017	1119	45	836	12	722.3	9.7	10.4
08TM007A_sp6_Zr6_8core		82000000	285.9	263.5	0.921651	-8	25	na	na	na	1	FALSE	1.366	0.34	0.1438	0.0098	0.36769	0.068	0.0014	857	44	874	16	866	12	2.46
08TM007A_sp6_Zr6_9core		86400000	361	634.9	1.75873	74	14	na	na	na	1	FALSE	1.413	0.063	0.1117	0.0055	0.69647	0.0913	0.0023	1452	49	897	22	682	13	20.8
08TM007A_sp6_Zr6_10core		107000000	228	266	1.16667	10	11	na	na	na	1	FALSE	1.18	0.063	0.1292	0.0067	0.6798	0.0673	0.0017	832	53	790	17	783	13	3.18
Mount Ephraim Block - Mount Ephraim plutonic suite: Sample M8-08TM105A
08TM105_sp4_Zr4_2		101400000	488	727	1.48975	6	15	na	na	na	1	FALSE	1.028	0.041	0.1188	0.0032	0.33183	0.0626	0.0026	691	41	717.5	9.7	724	11	2.46
08TM105_sp3_Zr3_2		76000000	199	317	1.59296	-11	13	na	na	na	1	FALSE	1.058	0.044	0.1215	0.0033	0.14155	0.0628	0.0026	699	45	732	11	739.2	6.4	3.6
08TM105_sp8_Zr7_1		76200000	459	672	1.46405	11	12	na	na	na	1	FALSE	0.988	0.063	0.1137	0.0033	0.27299	0.0628	0.0049	704	48	699	10	694	11	3.17
08TM105_sp7_Zr6_1		96300000	440	428	0.972727	2	14	na	na	na	1	FALSE	1.007	0.044	0.1147	0.0031	0.25626	0.0629	0.0029	697	51	706	13	700	9.6	2.85
08TM105_sp3_Zr3_4		96200000	233.7	370	1.58323	-19	16	na	na	na	1	FALSE	1.021	0.067	0.1168	0.0034	0.20973	0.0632	0.0038	713	64	716	15	712	11	4.13
08TM105_sp3_Zr3_3		74400000	139	302	2.17266	12	15	na	na	na	1	FALSE	1.07	0.049	0.1222	0.0041	0.35492	0.0638	0.0029	728	66	739	17	743	14	4.86
08TM105_sp6_Zr5_1		101600000	2720	4530	1.66544	29	12	na	na	na	1	FALSE	1.074	0.046	0.121	0.0033	0.26701	0.06447	0.0027	756	25	740.2	8.1	736.3	8.5	1.68
08TM105_sp10_Zr9_1rim		84100000	1209	2420	2.00165	40	16	na	na	na	1	FALSE	1.071	0.04	0.1198	0.0032	0.32859	0.0646	0.0025	764	27	738.8	6.5	729.2	6.2	1.77
08TM105_sp8_Zr7_2		69600000	305.2	295.6	0.968545	34	16	na	na	na	1	FALSE	1.022	0.044	0.1109	0.0031	0.072487	0.0656	0.0028	788	47	715	11	678	7	3.1
08TM105_sp4_Zr4_1rim		55600000	173	167	0.965318	27	20	na	na	na	1	FALSE	1.322	0.062	0.1398	0.0043	0.54617	0.0665	0.0032	838	76	863	22	843	18	4
08TM105_sp7_Zr6_2		80900000	303	284	0.937294	18	14	na	na	na	1	FALSE	1.165	0.048	0.1253	0.0038	0.4754	0.0676	0.0027	850	35	785	11	761	12	3.76
08TM105_sp3_Zr3_1	1	91600000	258	567	2.19767	-7	14	na	na	na	1	FALSE	1.091	0.044	0.1165	0.0033	0.42494	0.0684	0.0027	875	42	748	12	710.6	9.2	4.5
08TM105_sp10_Zr9_1core	1	102300000	954	1451	1.52096	35	26	na	na	na	1	FALSE	1.219	0.063	0.1293	0.0045	0.76192	0.0688	0.0031	890	36	808	16	783	20	3.01
08TM105_sp9_Zr8_1	1	105800000	917	1330	1.45038	45	19	na	na	na	1	FALSE	1.134	0.055	0.1164	0.0033	0.65966	0.0709	0.0034	960	32	769.2	8.9	709.8	8.6	5.94
08TM105_sp1_Zr1_1	1	88800000	296	486	1.64189	12	23	na	na	na	1	FALSE	1.311	0.075	0.1301	0.004	0.63584	0.0726	0.0046	1001	37	850	16	788	15	5.2
08TM105_sp2_Zr2_1		55200000	470	940	2	63	24	na	na	na	1	FALSE	1.4	0.091	0.1223	0.0041	0.8845	0.0788	0.0042	1172	70	884	44	744	26	10.4
08TM105_sp4_Zr4_3		79400000	203.3	313	1.5396	16	15	na	na	na	1	FALSE	1.256	0.055	0.1118	0.0033	0.01047	0.0808	0.0037	1205	57	827	14	685	11	13.1
08TM105_sp2_Zr2_2	1	57500000	293	251	0.856655	43	29	na	na	na	1	FALSE	1.59	0.23	0.142	0.0057	0.95314	0.081	0.0094	1221	38	962	48	856	58	8.5
Mount Ephraim Block - Mount Ephraim plutonic suite: Sample M11-08TM021A
08TM021A_1_Z1_4	1	85900000	102.1	155	1.51812	8	10	na	na	na	1	FALSE	1.081	0.033	0.1245	0.0017	0.11128	0.0635	0.0022	710	58	743	16	756.5	9.8	4.48
08TM021A_1_Z1_1	1	83000000	129	213	1.65116	-2.4	9.3	na	na	na	1	FALSE	1.125	0.034	0.1241	0.0018	0.14754	0.0662	0.0023	798	56	764	16	753.8	10	4.57
08TM021A_1_Z1_2		88100000	139.2	209	1.50144	50	11	na	na	na	1	FALSE	1.639	0.051	0.1288	0.0016	0.039886	0.0927	0.0032	1478	57	984	19	781	8.9	17.8
08TM021A_1_Z1_5		83100000	124.5	186	1.49398	26	11	na	na	na	1	FALSE	1.385	0.042	0.1311	0.0019	0.45478	0.0772	0.0026	1148	55	884	19	794	11	8.7
08TM021A_1_Z1_2		84300000	346	428	1.23699	9	10	na	na	na	1	FALSE	1.155	0.026	0.12798	0.0015	0.34644	0.0658	0.0018	795	34	779.4	13	776.3	8.6	2.33
08TM021A_2_Z1_2	1	78800000	125.7	183.9	1.46301	6.5	8.5	na	na	na	1	FALSE	1.085	0.034	0.1226	0.0017	0.27479	0.0654	0.0023	788	55	746	16	745.3	10	4.6
08TM021A_2_Z1_3	1	82800000	127.9	202.6	1.58405	7.1	8.1	na	na	na	1	FALSE	1.096	0.036	0.1225	0.0017	0.17412	0.0642	0.0024	766	60	750	17	744.8	10	4.79
08TM021A_3_Z1_6		85600000	47.1	63.7	1.35244	5	12	na	na	na	1	FALSE	0.843	0.14	0.0974	0.0032	0.37851	0.0668	0.0073	820	120	624	60	599	19	8.4
08TM021A_2_Z1_4		91100000	334	420	1.25749	10.5	8.7	na	na	na	1	FALSE	1.173	0.072	0.1277	0.002	0.28959	0.0667	0.0044	828	33	790	28	774.7	11	2.5
08TM021A_3_Z1_4		84300000	163.2	349	2.13848	4	9.3	na	na	na	1	FALSE	1.006	0.035	0.1163	0.0019	0.12789	0.0627	0.0024	707	66	707	18	709.2	11	5.25
08TM021A_3_Z1_5		85900000	144.6	307.2	2.12448	2.4	9.9	na	na	na	1	FALSE	1.029	0.038	0.1174	0.0016	0.2	0.0649	0.0029	763	68	719	19	715.6	9.4	5.09
08TM021A_3_Z1_2	1	72000000	358.8	255.2	0.71126	0	15	na	na	na	1	FALSE	1.12	0.031	0.1233	0.0017	0.35255	0.0657	0.002	792	47	762	14	749.7	9.9	2.53
08TM021A_3_Z1_1		86300000	255.1	331	1.29753	31	15	na	na	na	1	FALSE	1.218	0.08	0.1222	0.0019	0.58739	0.073	0.0042	1005	58	811	33	743	11	6.1
08TM021A_3_Z1_3		79400000	83	118.7	1.43012	83	13	na	na	na	1	FALSE	2.86	0.12	0.119	0.0021	0.60845	0.1772	0.01	2584	86	1372	33	725	12	57.8
08TM021A_4_Z1_1	1	75400000	303	287	0.947195	3.4	6.9	na	na	na	1	FALSE	1.087	0.026	0.1237	0.0016	0.70197	0.0632	0.0019	713	38	746	14	751.7	9	3.65
08TM021A_4_Z1_2		74700000	80.2	86.4	1.07731	24	10	na	na	na	1	FALSE	1.396	0.044	0.1211	0.002	0.052494	0.0844	0.0032	1306	65	888	19	737	12	13.8
08TM021A_4_Z1_3		84800000	178	273	1.53371	86	15	na	na	na	1	FALSE	2.02	0.076	0.128	0.0018	0.3407	0.1144	0.0048	1872	43	1121	24	777	10	29.7
08TM021A_5_Z1_2	1	79000000	463.8	592	1.27641	-2.2	6.9	na	na	na	1	FALSE	1.09	0.023	0.12303	0.0015	0.069837	0.06433	0.0017	748	32	748.3	11	748	8.5	2.52
08TM021A_6_Z1_2		79000000	390	88.6	0.227179	10	11	na	na	na	1	FALSE	1.045	0.024	0.11708	0.0015	0.15671	0.0648	0.0018	763	40	726	12	713.7	8.6	2.81
08TM021A_6_Z1_1		76900000	317.6	372	1.17128	12.9	9.4	na	na	na	1	FALSE	1.049	0.026	0.12036	0.0016	0.42365	0.064	0.0018	743	34	729.1	13	732.6	9.3	2.6
Mount Ephraim Block - Mount Ephraim plutonic suite: Sample M12-08TM041A
08TM041A-1	1	87734673	74	94	1.27027	5	na	na	na	na	1	FALSE	1.099	0.053	0.1216	0.003	0.79484	na	na	793	nan	751	26	740	17	<10
08TM041A-2	1	90831975	154	159	1.03247	22	na	na	na	na	1	FALSE	1.07	0.035	0.1218	0.0025	0.83769	na	na	725	nan	738	17	741	15	<10
08TM041A-3	1	16414981	52	83	1.59615	99	na	na	na	na	1	FALSE	1.07	0.12	0.1204	0.0054	0.86711	na	na	717	nan	748	54	732	31	<10
08TM041A-4	1	87298541	131	170	1.29771	34	na	na	na	na	1	FALSE	1.042	0.038	0.119	0.0021	0.76129	na	na	708	nan	724	19	725	12	<10
08TM041A-5		84211142	90	77	0.855556	35	na	na	na	na	1	FALSE	0.954	0.057	0.1167	0.0027	0.64224	na	na	521	nan	676	29	711	16	>10
08TM041A-6	1	92070271	71	54	0.760563	27	na	na	na	na	1	FALSE	1.05	0.057	0.1219	0.0027	0.62369	na	na	731	nan	731	30	741	15	<10
08TM041A-7	1	65817311	146	190	1.30137	8	na	na	na	na	1	FALSE	1.065	0.053	0.1231	0.0024	0.32539	na	na	722	nan	739	26	748	13	<10
Bass River Block - Debert River pluton: Sample B4-E11W13-212
E11-W13_212-2_Sp9-Zr1c	2	16000000	na	na	na	15.9	8.5		2027.04	na	1	FALSE	0.848	0.034	0.10041	0.0017	0.16489	0.0615	0.0019	645	55	622.8	17	616.7	10	-13
E11-W13_212-2_Sp9-Zr1r1	2	20600000	na	na	na	1	14		14760	na	1	FALSE	0.868	0.039	0.1003	0.0017	0.24673	0.0626	0.0024	685	68	633	19	616	10	7
E11-W13_212-2_Sp9-Zr1r2	3	14000000	na	na	na	8.5	7.7		1317.65	na	1	FALSE	0.824	0.033	0.103	0.0018	0.17979	0.0586	0.0021	525	72	610	18	631.8	11	5
E11-W13_212-2_Sp11-Zr1c	2	15000000	na	na	na	13.6	7.8		1120.59	na	1	FALSE	0.844	0.03	0.102	0.0016	0.15691	0.06	0.0018	577	63	622	17	626	9.5	<10
E11-W13_212-2_Sp11-Zr1r1	2	19500000	na	na	na	-1	15		-12520	na	1	FALSE	0.842	0.053	0.1002	0.002	0.04762	0.0602	0.0032	580	90	621	25	615.3	12	<10
E11-W13_212-2_Sp11-Zr1r2		18100000	na	na	na	-23	10		-678.261	na	1	FALSE	0.926	0.042	0.1004	0.0018	0.26595	0.0663	0.0025	801	71	664	21	616.7	10	<10
E11-W13_212-2_Sp12-Zr1c	1	14400000	na	na	na	9.4	7.8		750	na	1	FALSE	0.871	0.05	0.0982	0.0019	0.029054	0.0642	0.0031	766	89	640	24	603.7	11	<10
E11-W13_212-2_Sp13-Zr1c	1	14800000	na	na	na	13.6	7.9		766.912	na	1	FALSE	0.838	0.042	0.0966	0.0016	0.18188	0.0627	0.0027	658	76	617	19	594.4	9.5	<10
E11-W13_212-1_Sp-1Zr1c		15200000	na	na	na	12.3	8.7		6252.03	na	1	FALSE	0.869	0.022	0.09988	0.0015	0.1965	0.06331	0.001	714	34	635.3	12	613.7	8.5	>10
E11-W13_212-1_Sp1-Zr1r	2	19000000	na	na	na	8	13		6750	na	1	FALSE	0.865	0.11	0.10101	0.0023	0.35427	0.0616	0.0057	654	110	632.2	40	620.3	13	<10
E11-W13_212-1_Sp2-Zr1c	2	15500000	na	na	na	-4	11		-2545	na	1	FALSE	0.873	0.049	0.1021	0.0017	0.073992	0.0607	0.0033	628	90	638	24	626.7	10	<10
E11-W13_212-1_Sp2-Zr1i		13400000	na	na	na	5.7	8		1684.21	na	1	FALSE	0.891	0.043	0.09928	0.0017	0.043463	0.0651	0.0026	782	73	649	20	610.1	9.9	>10
E11-W13_212-1_Sp2-Zr1r	1	16800000	na	na	na	-17	10		-1116.47	na	1	FALSE	0.819	0.13	0.0984	0.0021	0.018454	0.0609	0.0068	611	130	610	49	604.9	12	<10
E11-W13_212-1_Sp3-Zr2r		11300000	na	na	na	9	12		1180	na	1	FALSE	1.006	0.054	0.0984	0.0017	0.10613	0.0762	0.0031	1099	63	707	22	604.8	10	>10
E11-W13_212-1_Sp4-Zr1r1	3	17100000	na	na	na	13	14		1162.31	na	1	FALSE	1.057	0.2	0.1021	0.0031	0.36179	0.075	0.01	1020	150	727	61	626.9	18	<10
E11-W13_212-1_Sp4-Zr1r2		15200000	na	na	na	9	11		1744.44	na	1	FALSE	0.917	0.039	0.09739	0.0017	0.089036	0.0687	0.0025	872	74	660	20	599.1	10	>10
E11-W13_212-1_Sp5-Zr1r		12700000	na	na	na	6	8.2		1941.67	na	1	FALSE	0.888	0.048	0.09506	0.0017	0.18155	0.0683	0.0028	857	70	645	21	585.4	9.7	>10
E11-W13_212-1_Sp5-Zr2c	1	16700000	na	na	na	3.7	9		5843.24	na	1	FALSE	0.83	0.038	0.0976	0.0019	0.26988	0.0622	0.0023	679	64	613	19	600.5	11	<10
E11-W13_212-1_Sp6-Zr1c1	2	14600000	na	na	na	5.6	7.3		3267.86	na	1	FALSE	0.839	0.029	0.10012	0.0016	0.086196	0.0605	0.0016	602	54	617	15	615.1	9.5	<10
E11-W13_212-1_Sp6-Zr1c2	2	15200000	na	na	na	7	9.4		2561.43	na	1	FALSE	0.866	0.042	0.10073	0.0019	0.2136	0.0623	0.0023	681	72	633	21	619.2	11	<10
E11-W13_212-1_SP7-Zr1c		17200000	na	na	na	53	18		561.887	na	1	FALSE	1.213	0.3	0.1084	0.0035	0.14395	0.0808	0.011	1231	130	808	70	663.3	20	<10
E11-W13_212-1_Sp7-Zr1r1	3	15500000	na	na	na	14.6	8.1		5239.73	na	1	FALSE	0.889	0.022	0.10441	0.0016	0.33775	0.06153	0.001	658	34	645.3	12	640.1	9.1	<10
E11-W13_212-1_Sp7-Zr1r2	2	15100000	na	na	na	18.9	8.6		2973.54	na	1	FALSE	0.868	0.023	0.1018	0.0015	0.045681	0.06202	0.0011	675	36	635.9	12	624.9	8.9	<10
E11-W13_212-1_Sp8- ZR1r2	1	14600000	na	na	na	2.2	8.2		5454.55	na	1	FALSE	0.864	0.034	0.09841	0.0016	0.096706	0.063	0.0021	676	71	630	18	605	9.6	<10
E11-W13_212-1_Sp8-Zr1r1	2	14800000	na	na	na	13	7.2		1106.92	na	1	FALSE	0.856	0.035	0.1027	0.0018	0.16243	0.0608	0.002	628	66	627	17	629.8	10	<10
E11-W13_212-1_SP8-Zr1r3	2	14500000	na	na	na	14.2	7.7		2162.68	na	1	FALSE	0.844	0.026	0.10031	0.0016	0.34949	0.0613	0.0014	650	46	622.1	14	616.2	9.4	<10

## Sheet: Info
This Supplemental Material accompanies
White, C.E., Barr, S.M., Crowley, J.L., van Rooyen, D., and MacHattie, T.G., 2022, U-Pb zircon ages and
Sm-Nd isotopic data from the Cobequid Highlands, Nova Scotia, Canada: New contributions to understanding
the Neoproterozoic geologic history of Avalonia, in Kuiper, Y.D., Murphy, J.B., Nance, R.D., Strachan, R.A.,
and Thompson, M.D., eds., New Developments in the Appalachian-Caledonian-Variscan Orogen:
Geological Society of America Special Paper 554, https://doi.org/10.1130/2021.2554(07).

## Sheet: Reference material
Table S1: LA-ICP-MS U-Pb isotopic analyses of zircon reference materials analyzed at the University of New Brunswick.														corrections			cps = counts per second
														1	threshold 204cps for no correction				100	cps
														3	threshold % for 204-based correction				20	% error
														2	threshold % for 208-based correction				98.5	%Pb*
												Isotopic ratios							Calculated ages
Sample	Zr90 cps	U (ppm)	Th (ppm)	Th/U	204Pb cps	2σ error	% error	206Pb cps/	%Pb*	Corrections		207Pb/	2σ	206Pb/	2σ	err.	207Pb/	2σ	207Pb/	2σ	207Pb/	2σ	206Pb/	2σ	%conc
						on 204 cps	on 204 cps	204Pb cps	radiogenic			235U	±	238U	±	corr.	206Pb	±	206Pb	±	235U	±	238U	±
Plesovice - 1	5.91768e+07	685.2	59.83	11.4524	19	11	57.8947	1035.26	98.72	1	FALSE	0.463	0.014	0.05385	0.00068	0.21689	0.063	0.0018	706	62	385.6	9.7	338.1	4.1	87.6815
Plesovice - 2	6.05081e+07	551.4	45.39	12.1481	5	13	260	3948	99.87	1	FALSE	0.3833	0.01	0.05306	0.00066	0.15302	0.0524	0.0013	301	55	330.2	7.5	333.3	4	100.939
Plesovice - 3	5.79617e+07	386.8	40.09	9.64829	1	12	1200	15440	98.95	1	FALSE	0.444	0.012	0.05252	0.00072	0.26241	0.0611	0.0016	629	59	372.1	8.7	330	4.4	88.6858
Plesovice - 4	5.97515e+07	390.1	36.08	10.8121	-17	13	-76.4706	15460	99.82	1	FALSE	0.3741	0.011	0.05112	0.0007	0.046386	0.0532	0.0016	319	65	323.4	8.1	321.4	4.3	99.3816
Plesovice - 5	5.79861e+07	485.4	47.08	10.3101	-7	12	-171.429	16930	99.83	1	FALSE	0.3668	0.011	0.05108	0.00067	0.053792	0.0526	0.0015	300	63	318	7.8	321.2	4.1	101.006
Plesovice - 6	5.75318e+07	229.5	22.15	10.3612	17	13	76.4706	624.118	98.81	1	FALSE	0.409	0.014	0.04857	0.00068	0.17431	0.0613	0.002	638	73	348	10	305.7	4.2	87.8448
Plesovice - 7	5.68576e+07	811.8	73.82	10.997	3.1	9.9	319.355	9474.19	99.91	1	FALSE	0.3697	0.0089	0.05141	0.00066	0.13325	0.05206	0.0012	276	52	319.6	6.5	323.1	4.1	101.095
Plesovice - 8	5.60384e+07	2863	291.8	9.81151	6	10	166.667	2398.33	99.9	1	FALSE	0.3649	0.011	0.05094	0.00066	0.062555	0.0524	0.0016	293	66	316.6	8.6	320.3	4.1	101.169
FC1 - 1	1.49637e+08	241.7	151.6	1.59433	-1	15	-1500	38060	99.804	1	FALSE	1.97	0.031	0.1873	0.0024	0.20333	0.0765	0.0011	1104	28	1104.6	11	1106.8	13	100.195
FC1 - 2	1.37718e+08	243.1	156.6	1.55236	4	15	375	9145	99.801	1	FALSE	1.945	0.033	0.1855	0.0023	0.18069	0.0759	0.0011	1096	29	1096.7	11	1096.9	13	100.108
FC1 - 3	1.43358e+08	279.9	178.4	1.56895	-3	21	-700	43910	99.76	1	FALSE	1.985	0.043	0.1882	0.0026	0.17134	0.0772	0.0016	1128	41	1112	15	1111.6	14	97.4482
FC1 - 4	1.3038e+08	206.8	128.3	1.61185	2	12	600	15435	99.746	1	FALSE	1.936	0.033	0.1848	0.0024	0.26421	0.076	0.0012	1094	30	1096.1	11	1093.3	13	99.9424
FC1 - 5	1.30889e+08	276.1	156.2	1.76761	-6	15	-250	42300	99.809	1	FALSE	1.944	0.033	0.1856	0.0024	0.19173	0.0758	0.001	1101	27	1096.3	11	1097.6	13	100.684
FC1 - 6	1.23483e+08	134.4	75.91	1.77052	-21	16	-76.1905	19450	99.6	1	FALSE	1.948	0.043	0.1846	0.0024	0.19584	0.0763	0.0015	1105	39	1097	15	1091.8	13	98.9264
FC1 - 7	1.3155e+08	172.6	98.5	1.75228	7	16	228.571	3745.71	99.65	1	FALSE	1.946	0.044	0.186	0.0027	0.33674	0.0762	0.0016	1101	41	1099	16	1099.4	15	100.581
FC1 - 8	1.25728e+08	299.2	177.8	1.68279	-3	15	-500	44870	99.857	1	FALSE	1.948	0.029	0.1862	0.0023	0.15507	0.07557	0.00097	1083	26	1096.8	10	1100.5	13	102.229
FC1 - 9	1.25002e+08	248.9	120.9	2.05873	-7	14	-200	36900	99.681	1	FALSE	1.929	0.034	0.184	0.0024	0.27011	0.0762	0.0012	1105	32	1095	12	1088.9	13	97.967
FC1 - 10	1.20413e+08	112.5	39.33	2.86041	18	12	66.6667	915.556	99.68	1	FALSE	1.947	0.046	0.1858	0.0026	0.36655	0.0761	0.0016	1096	44	1096	16	1098.3	14	100.211
FC1 - 11	1.18873e+08	153	64.95	2.35566	-3	14	-466.667	22020	99.65	1	FALSE	1.956	0.046	0.185	0.0025	0.15595	0.0766	0.0017	1110	44	1099	16	1095.3	13	98.5994
FC1 - 12	1.22352e+08	64.5	35.24	1.83031	14	17	121.429	672.857	99.61	1	FALSE	1.98	0.064	0.1863	0.0034	0.38199	0.0767	0.0024	1101	59	1107	22	1101	18	98.852
FC1 - 13	1.24657e+08	291.6	176.2	1.65494	-2	16	-800	43680	99.7	1	FALSE	1.984	0.039	0.1872	0.0025	0.19833	0.0765	0.0014	1107	38	1111	14	1106	13	99.544
FC1 - 14	1.17922e+08	205.6	78.79	2.60947	15	15	100	2020.67	99.73	1	FALSE	1.941	0.039	0.1857	0.0024	0.16203	0.0759	0.0014	1089	36	1094	13	1098.1	13	100.952
FC1 - 15	1.15697e+08	112.21	74.22	1.51186	-8	14	-175	16250	99.63	1	FALSE	1.945	0.048	0.1854	0.0026	0.21309	0.0765	0.0018	1094	46	1095	17	1096.4	14	100.406
FC1 - 16	1.15247e+08	332.7	206.6	1.61036	-35	16	-45.7143	49060	99.823	1	FALSE	1.959	0.032	0.1868	0.0023	0.20806	0.07613	0.00099	1096	27	1100.4	11	1103.7	13	100.828
z_Plesovice - 1	148000000	551.7	49.2	11.21	8	15	187.5	3140	99.9	1	FALSE	0.398	0.01	0.054	0.001	0.256	0.0532	0.0013	322	54	340	8	342	4	100.7
z_Plesovice - 2	132000000	697.2	66.47	10.49	14	14	100	2126	99.83	1	FALSE	0.399	0.009	0.054	0.001	0.124	0.0537	0.0012	343	52	340	7	340	4	99.8
z_Plesovice - 3	138000000	592	54.1	10.94	6	16	266.7	4388	99.92	1	FALSE	0.39	0.01	0.054	0.001	0.022	0.0527	0.0014	303	59	334	8	340	4	101.9
z_Plesovice - 4	138000000	562.8	50.16	11.22	8	14	175	3175	99.9	1	FALSE	0.392	0.01	0.054	0.001	0	0.0525	0.0013	305	57	335	7	340	4	101.4
z_Plesovice - 5	137000000	748.6	71.8	10.43	-4	18	-450	33440	99.85	1	FALSE	0.394	0.009	0.054	0.001	0.138	0.0528	0.0011	313	49	337	7	339	5	100.7
z_Plesovice - 6	123000000	702.8	65.19	10.78	4	15	375	7530	99.76	1	FALSE	0.404	0.01	0.054	0.001	0.009	0.0538	0.0012	338	49	344	7	341	4	99.1
z_Plesovice - 7	128000000	647.2	58.48	11.07	3	15	500	9437	99.69	1	FALSE	0.399	0.01	0.054	0.001	0.17	0.054	0.0012	363	52	340	7	339	5	99.5
z_Plesovice - 8	131000000	957.2	82.9	11.55	7	17	242.9	5943	99.72	1	FALSE	0.393	0.009	0.054	0.001	0.131	0.0531	0.0012	322	53	336	7	338	5	100.4
z_Plesovice - 9	117000000	748.9	71.89	10.42	4	15	375	7723	99.84	1	FALSE	0.391	0.008	0.054	0.001	0.071	0.0527	0.0009	317	40	335	6	337	4	100.7
z_Plesovice - 10	118000000	651.8	58.72	11.1	-24	18	-75	27590	99.82	1	FALSE	0.392	0.008	0.054	0.001	0.115	0.053	0.001	318	43	337	6	338	4	100.4
z_Plesovice - 11	114000000	772.1	77.77	9.93	-5	16	-320	32290	99.74	1	FALSE	0.403	0.008	0.054	0.001	0.095	0.0539	0.001	355	41	344	6	338	4	98.5
z_Plesovice - 12	113000000	825.1	86.3	9.56	0	12	#DIV/0!	34620	99.72	1	FALSE	0.397	0.007	0.054	0.001	0.018	0.0536	0.0009	354	40	339	5	339	4	100.1
